# Supplementary material for: HPLC Method Development and Validation for the Determination of Apixaban and Clopidogrel in Novel Fixed-Dose Combination Tablets
Source: Hindawi journal article supplement (doi:10.1155/2024/2675736), 2024-01-25
Supplement: f1 [file 2675736.f1.docx]

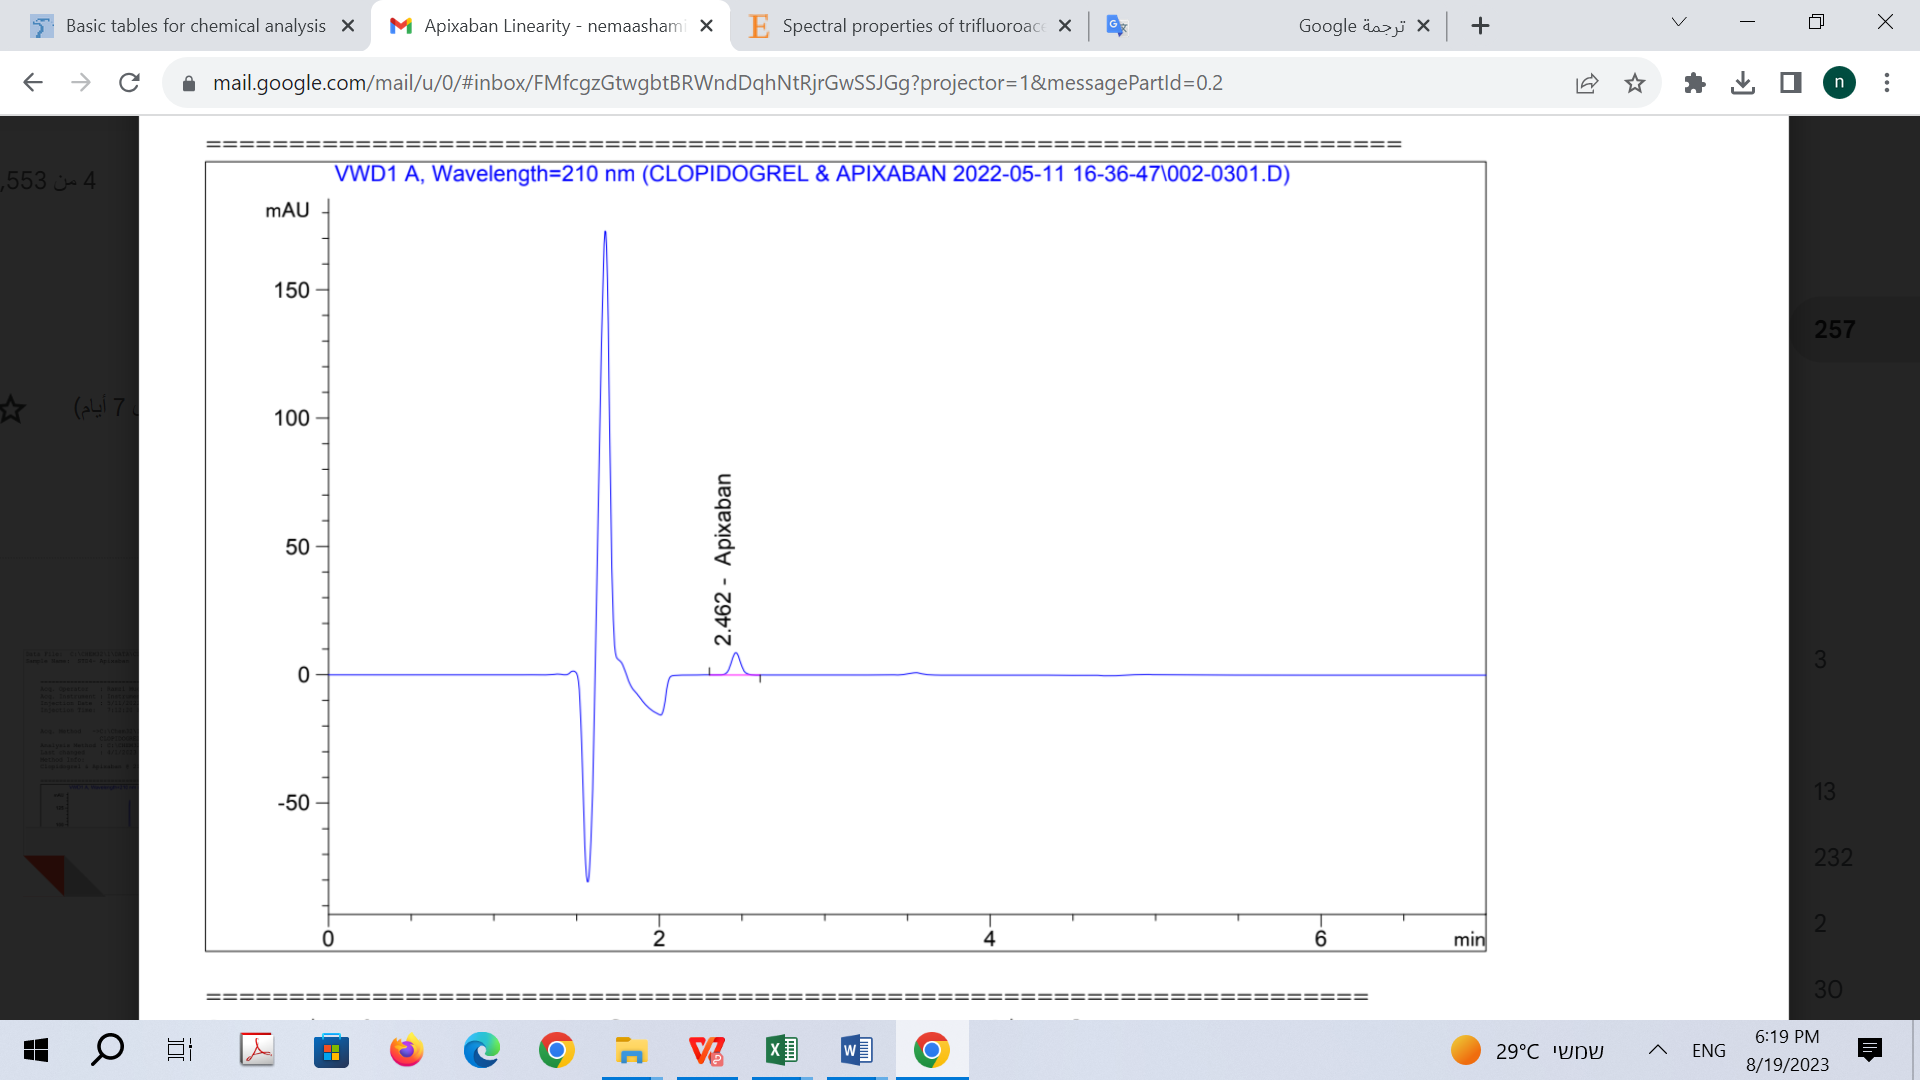

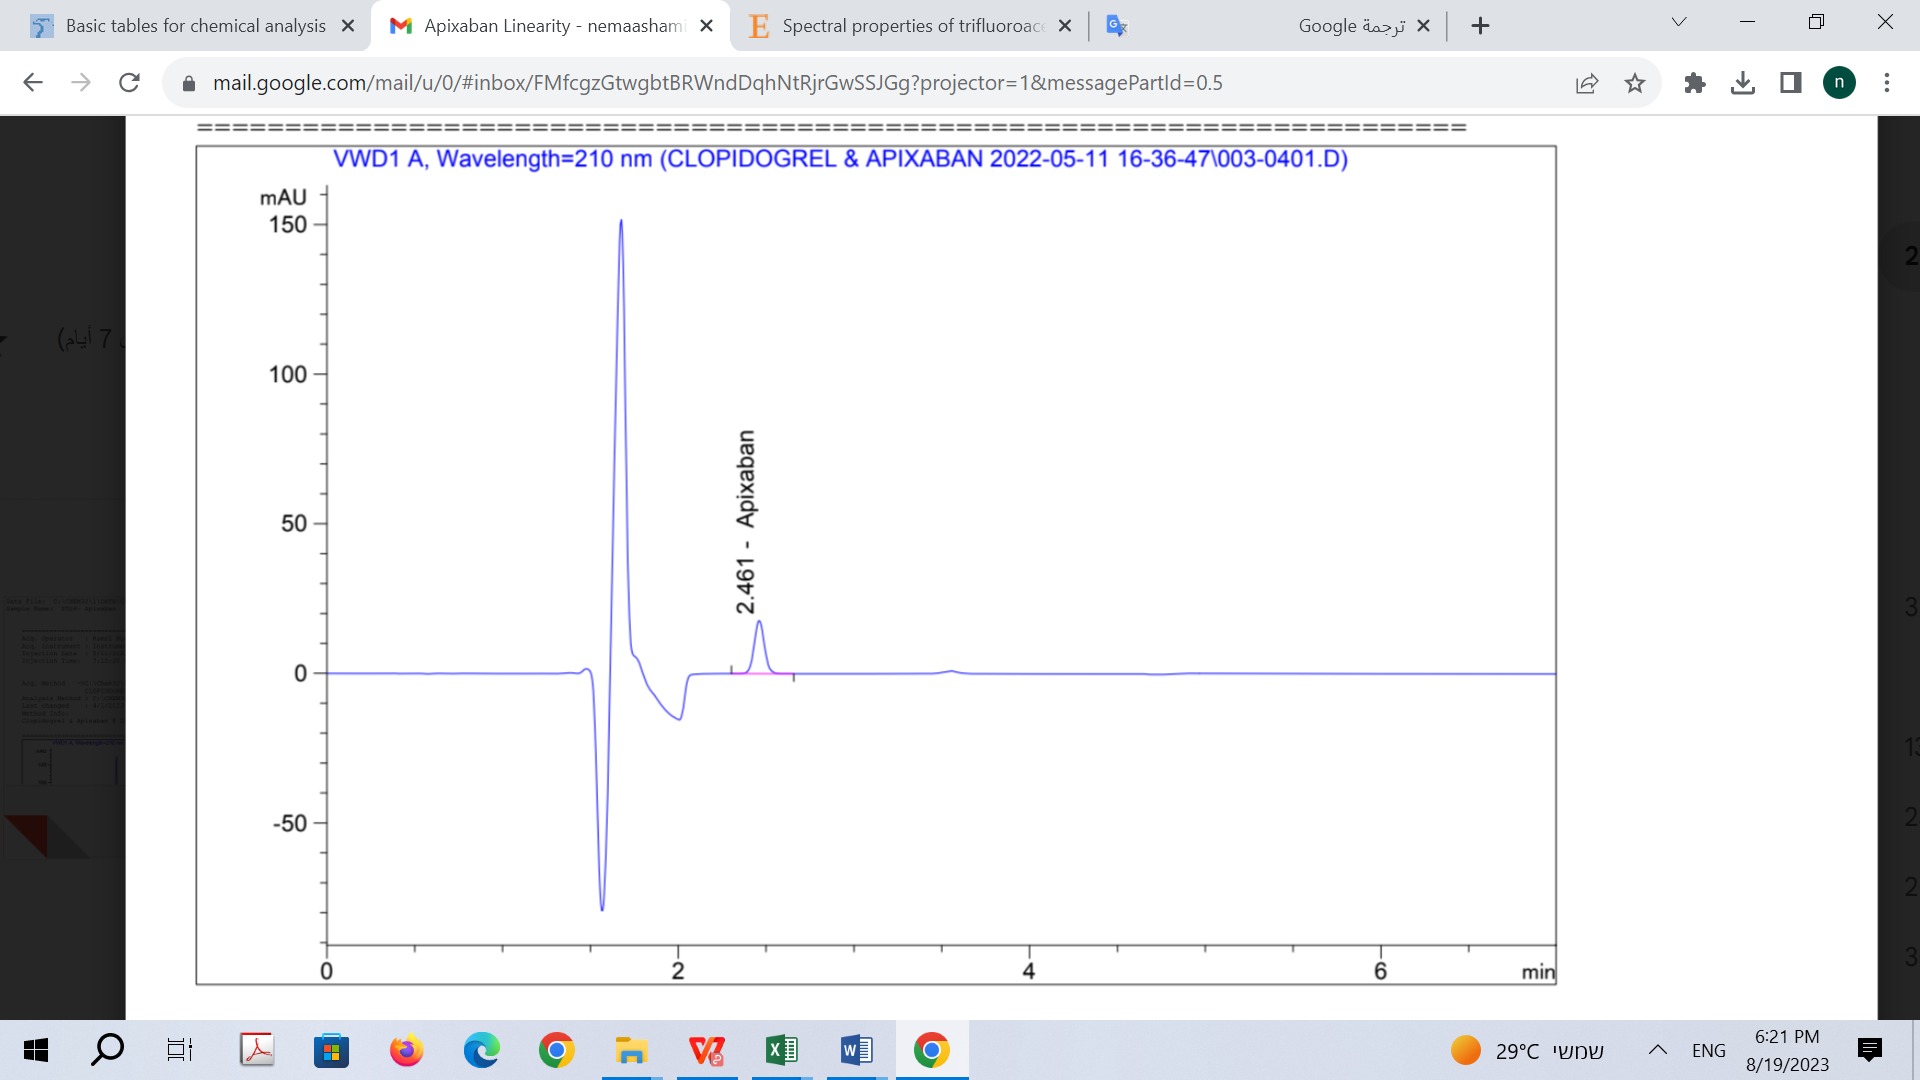


B

A


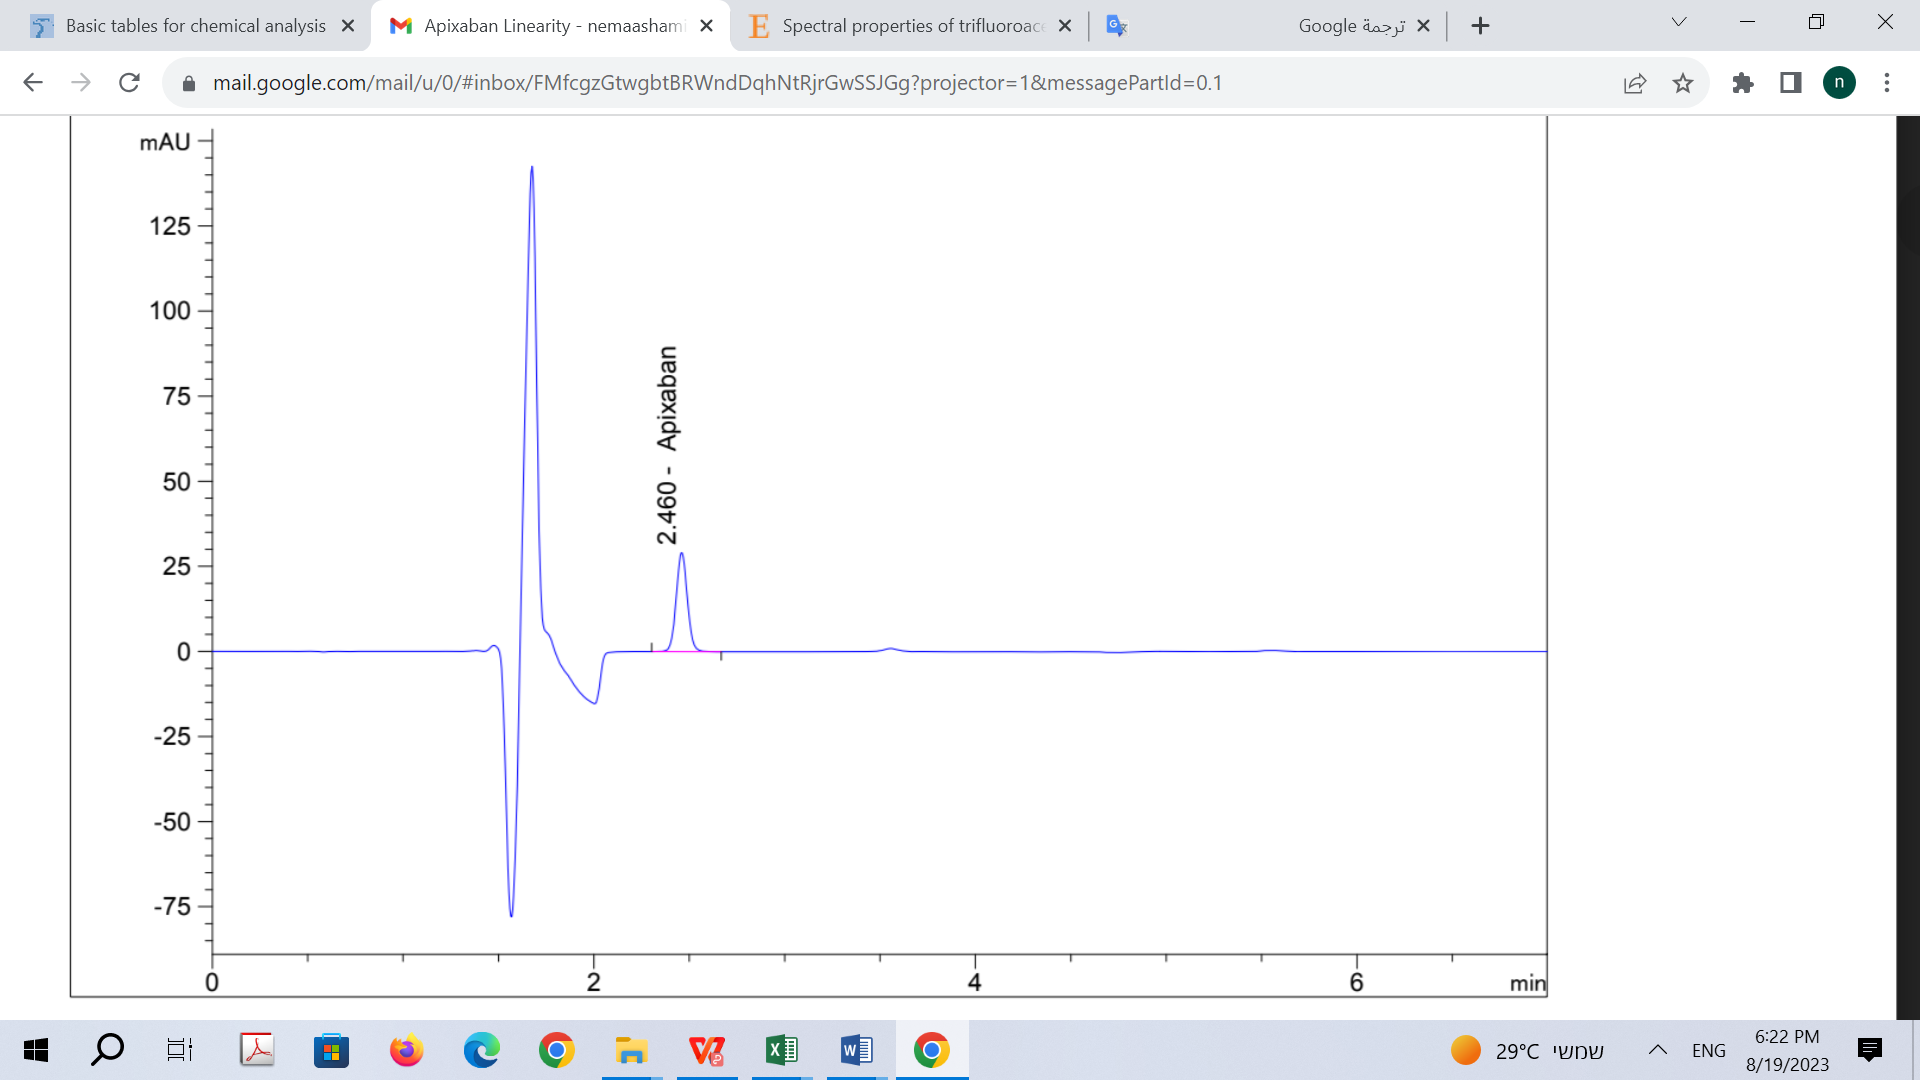

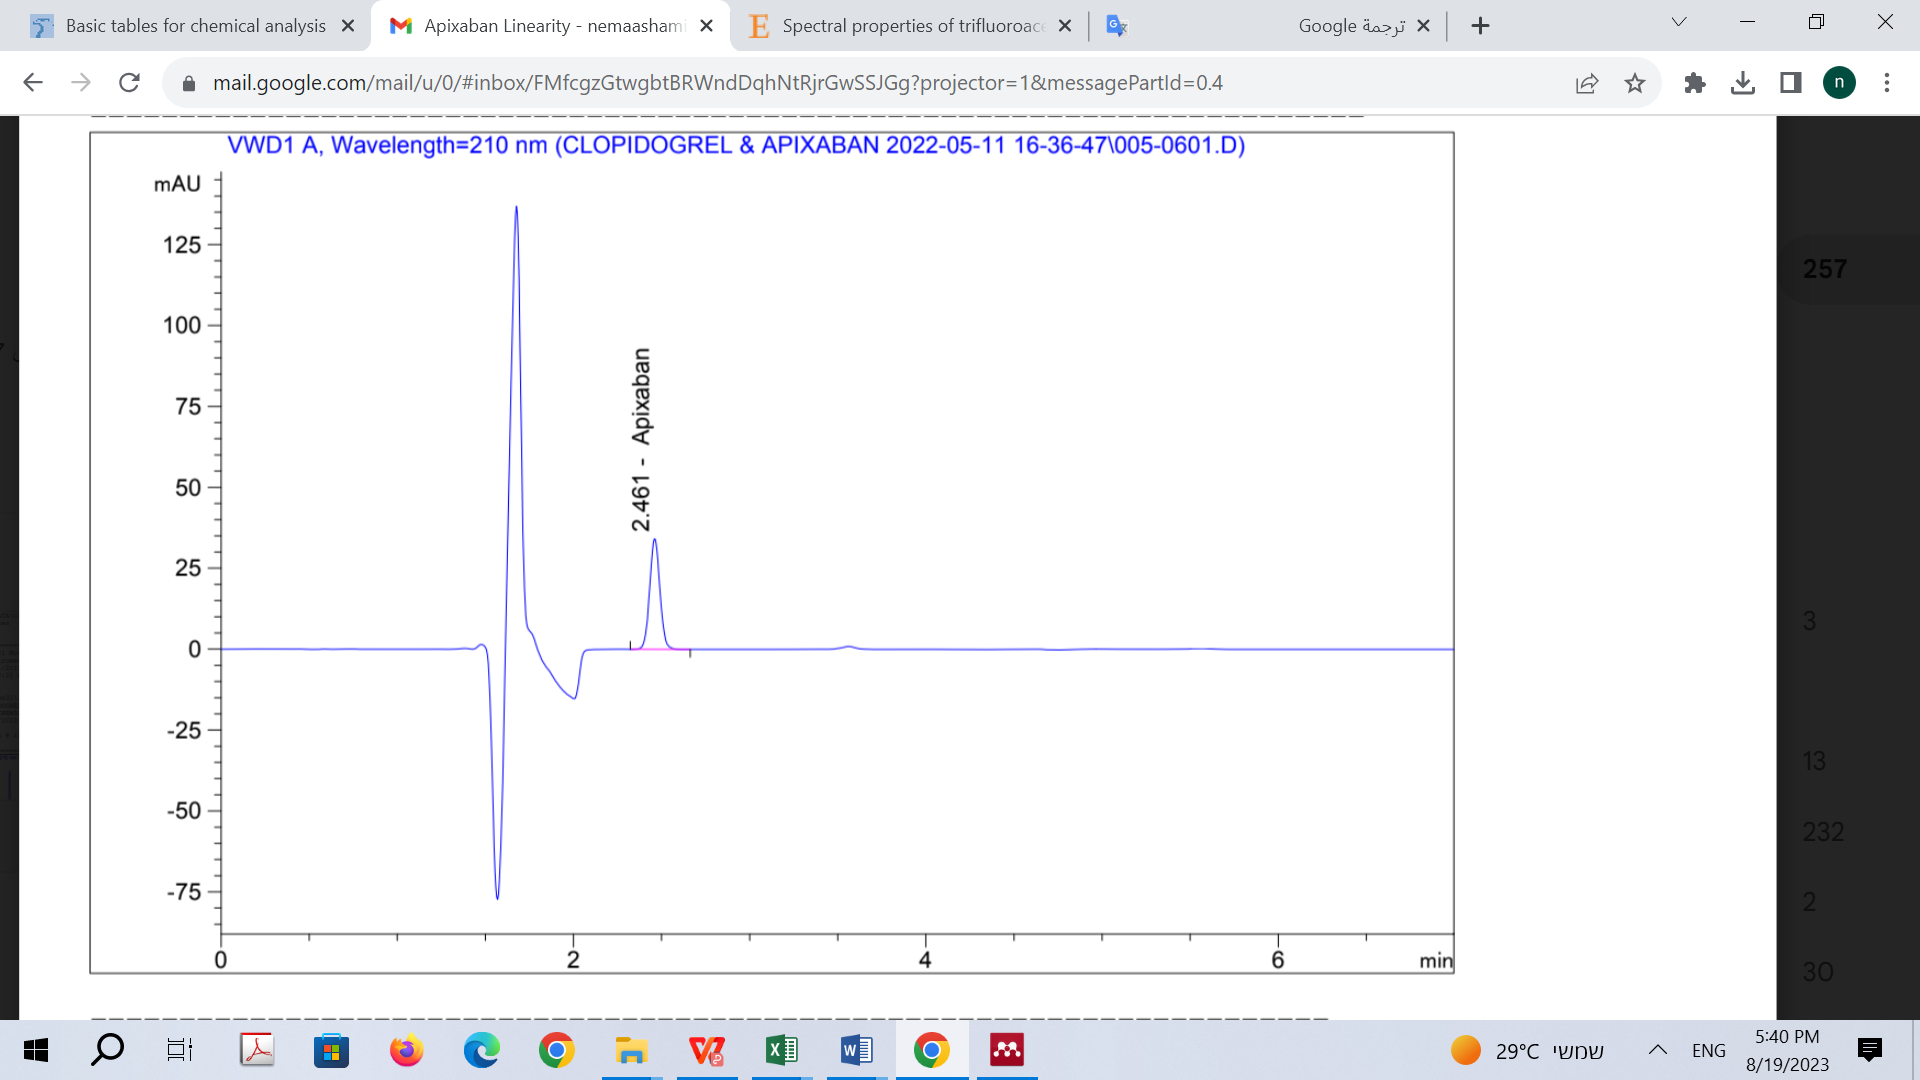


DD

C


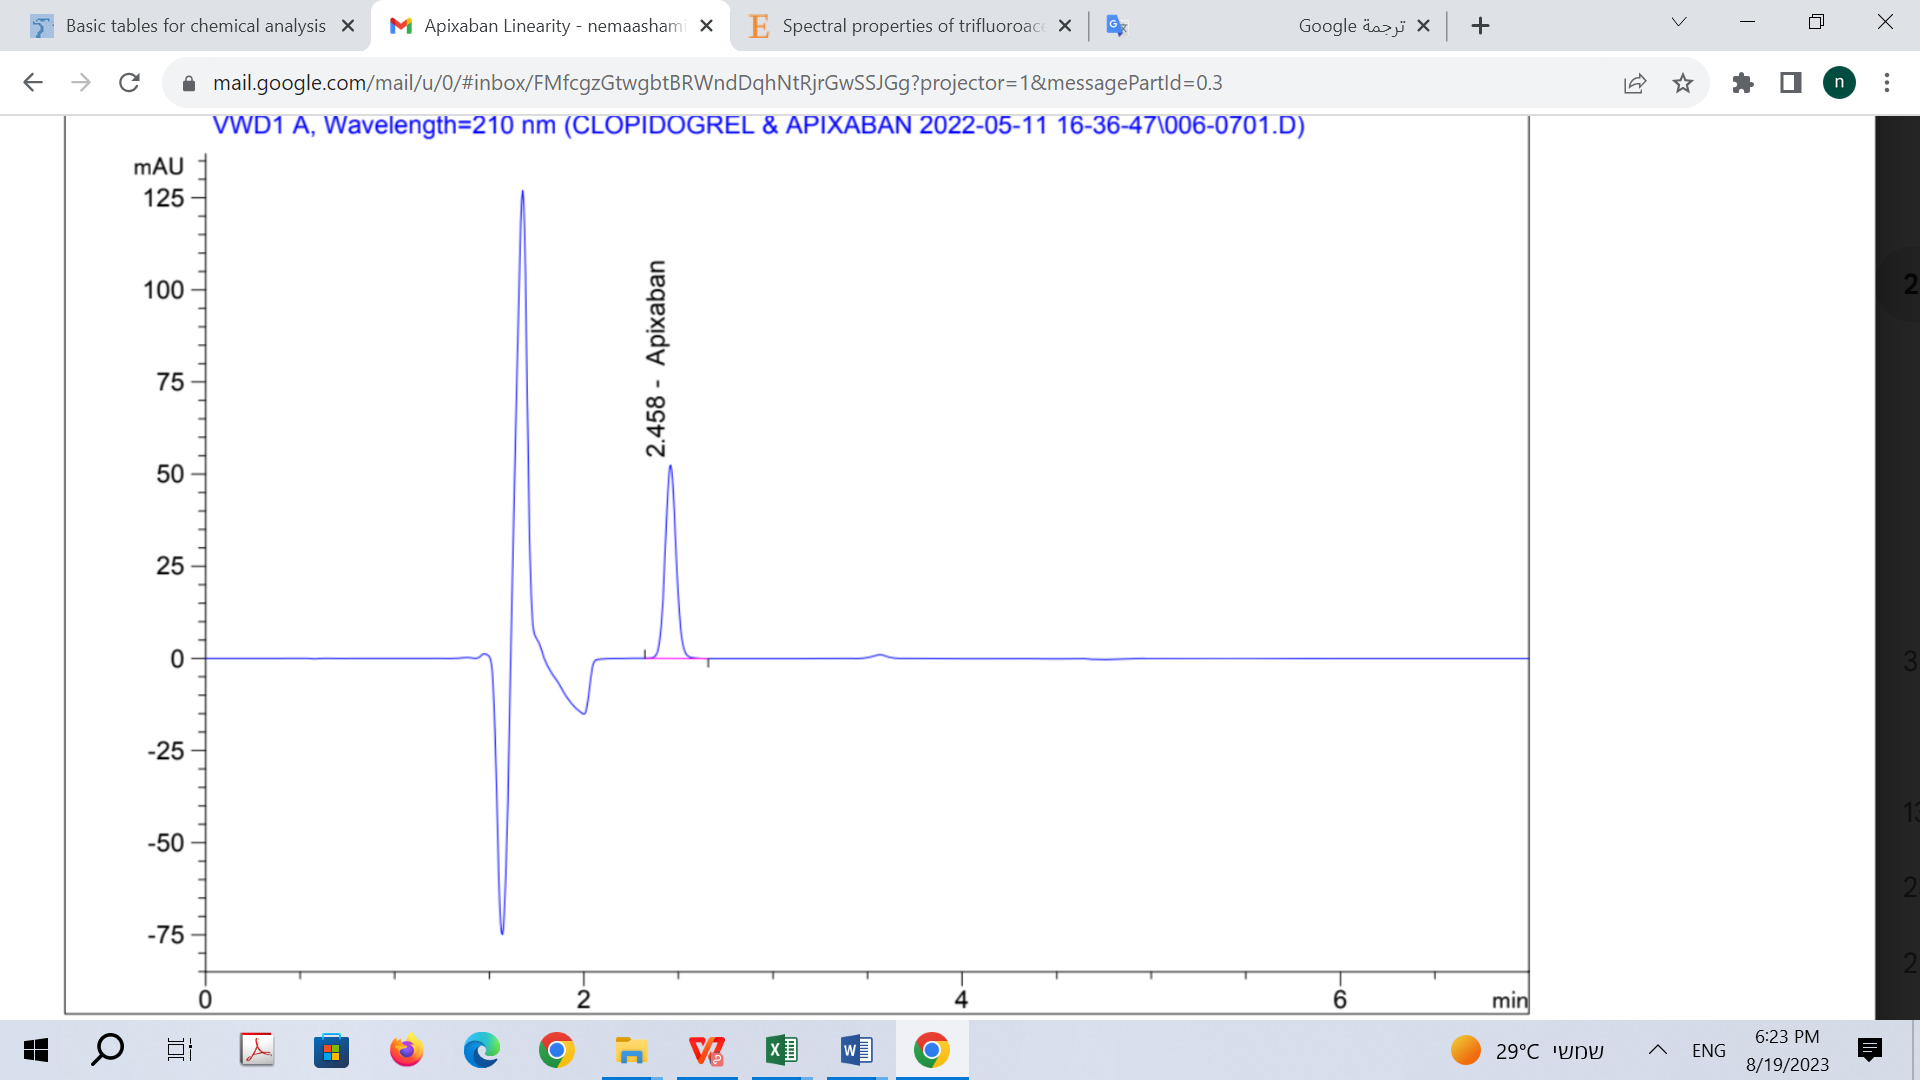

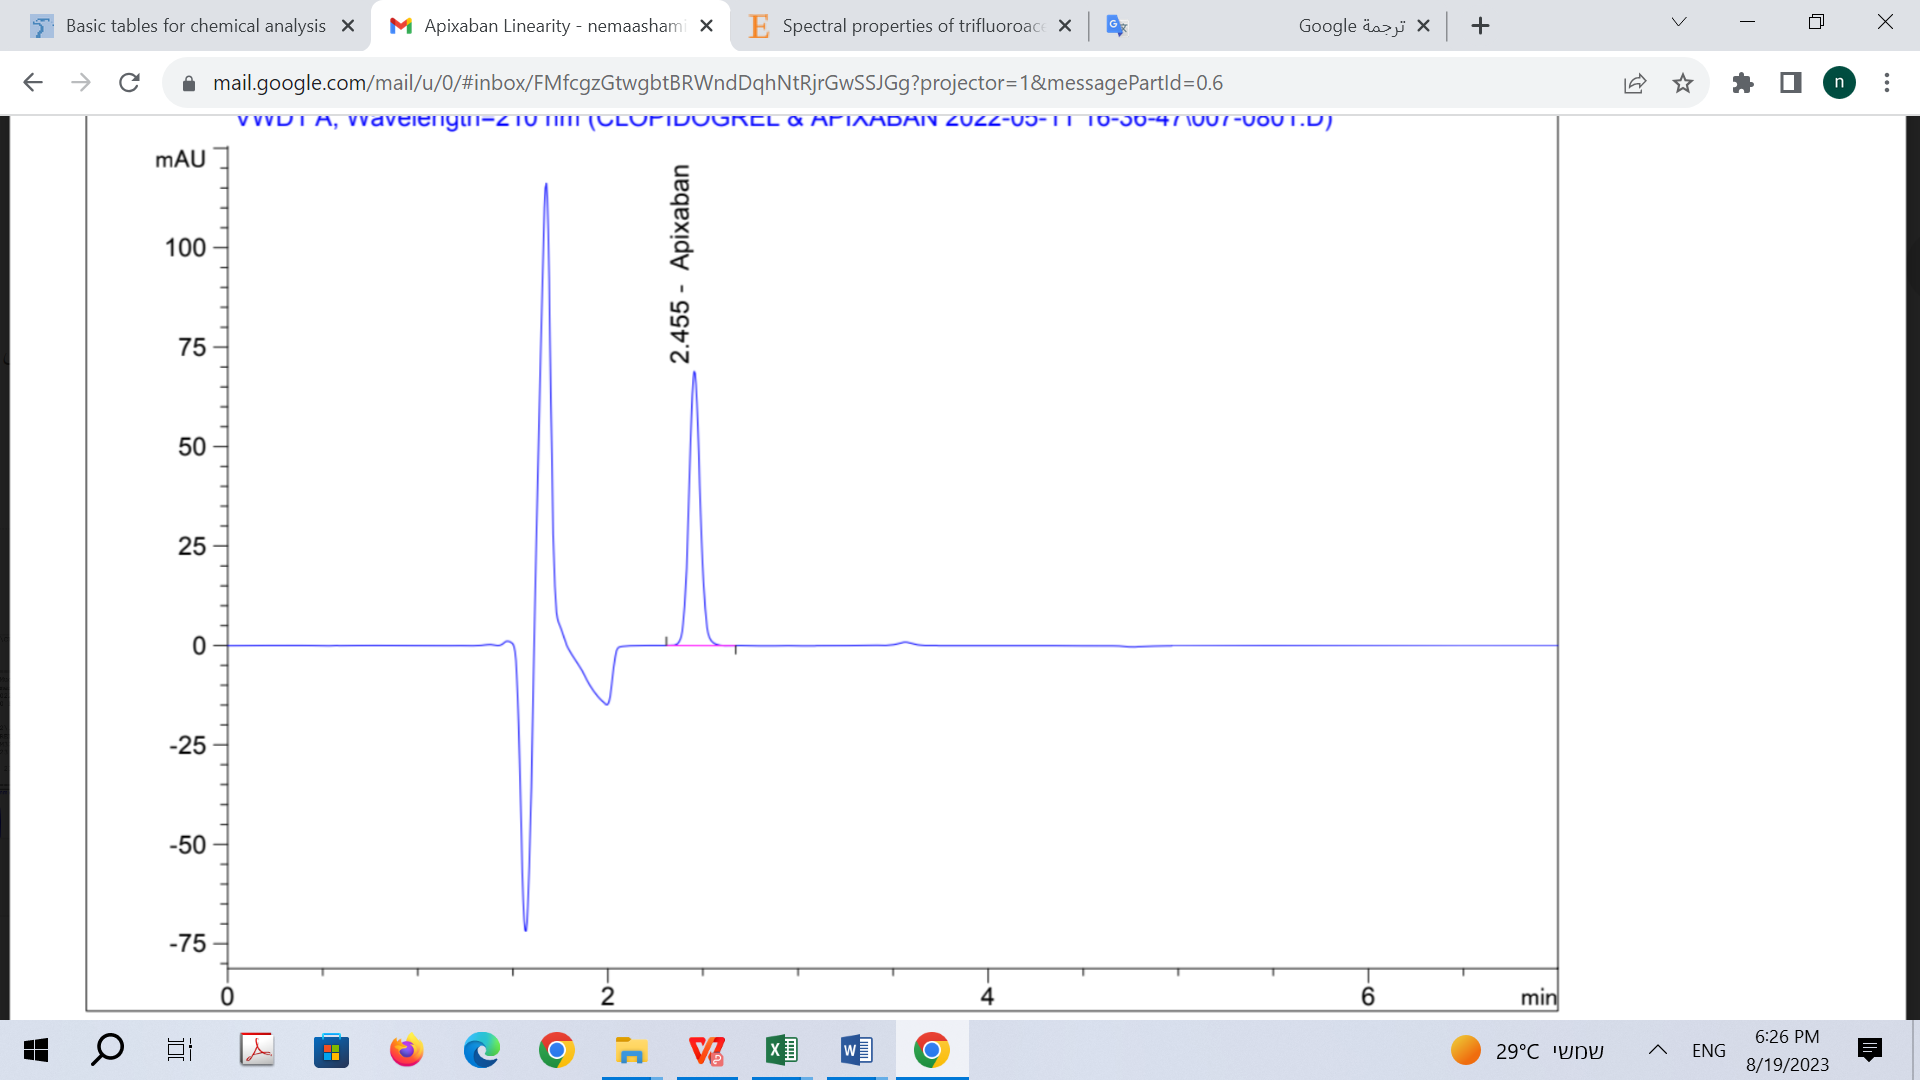


F

E

Figure 1: Apixaban linearity chromatograms; A: 1.25μg/ml, B: 2.5μg/ml, C: 4μg/ml, D: 5μg/ml, E: 7.5μg/ml, F: 10μg/ml.


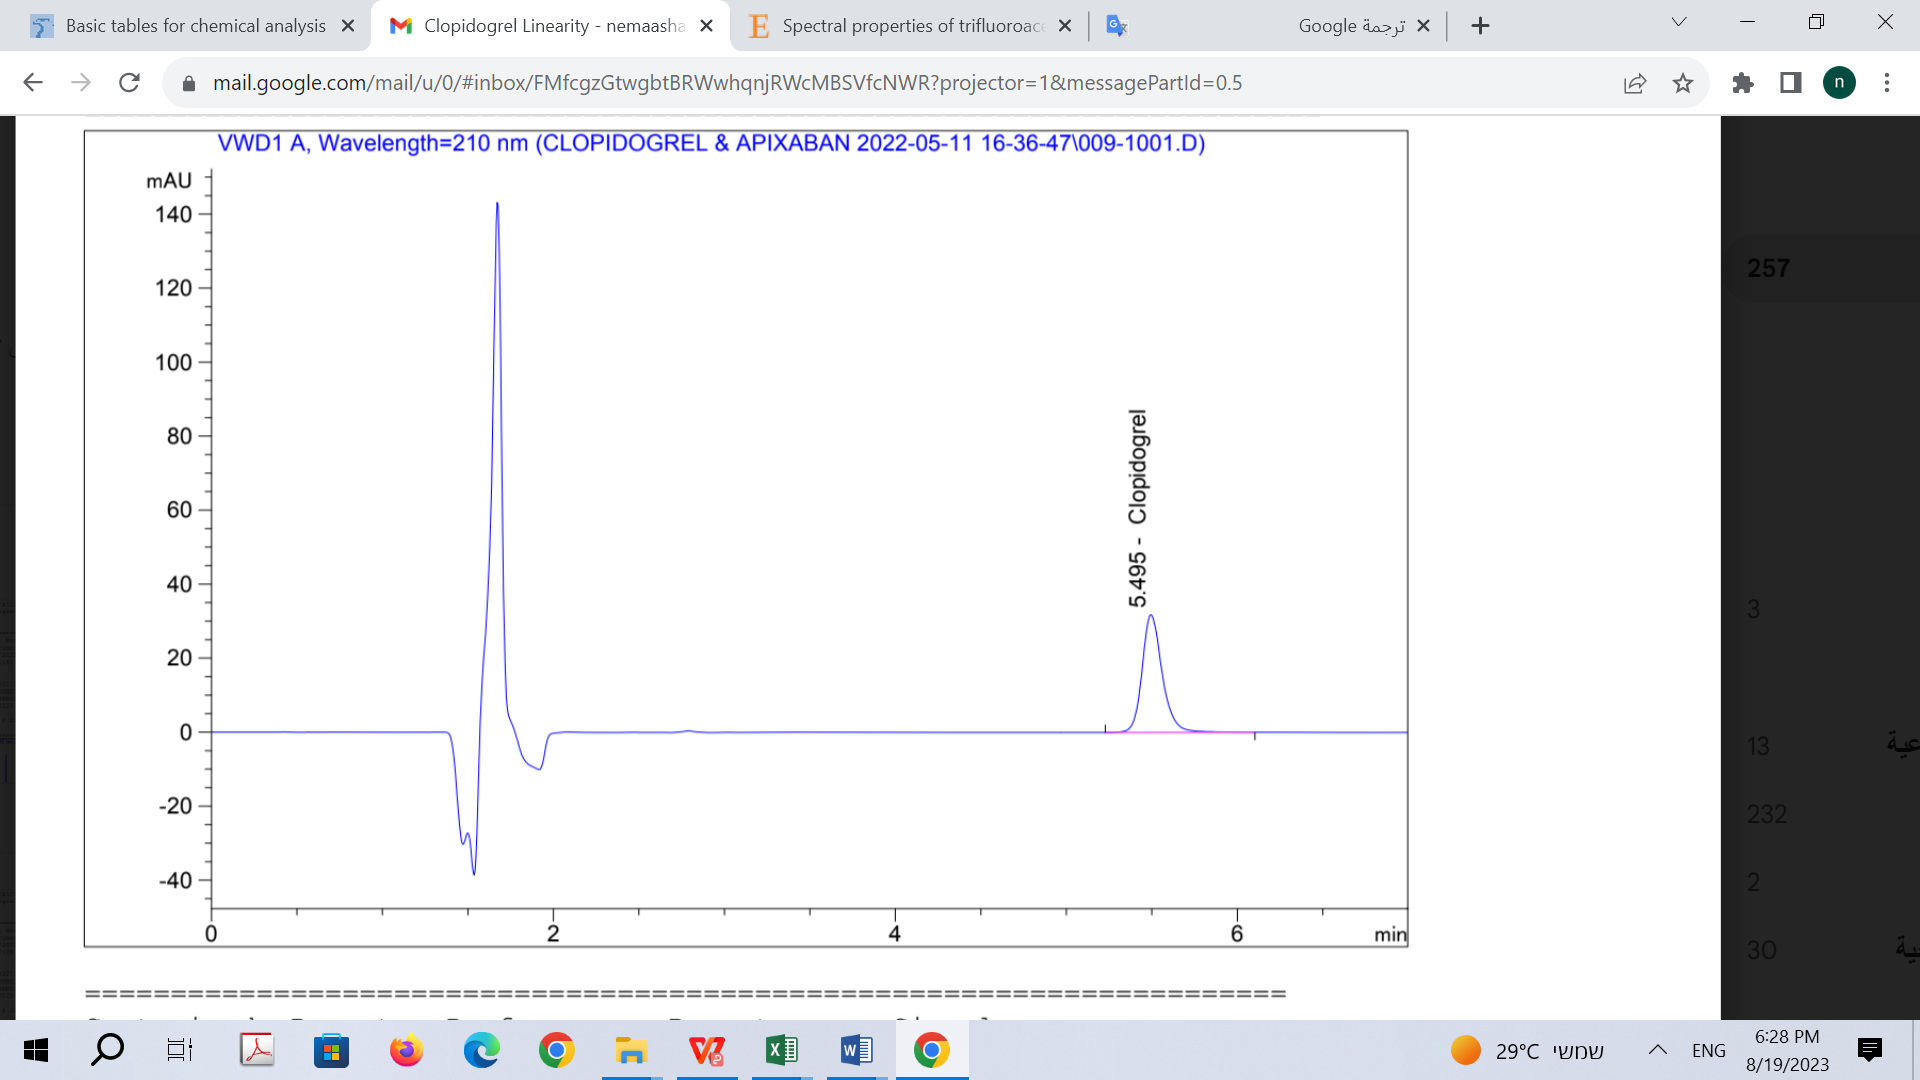

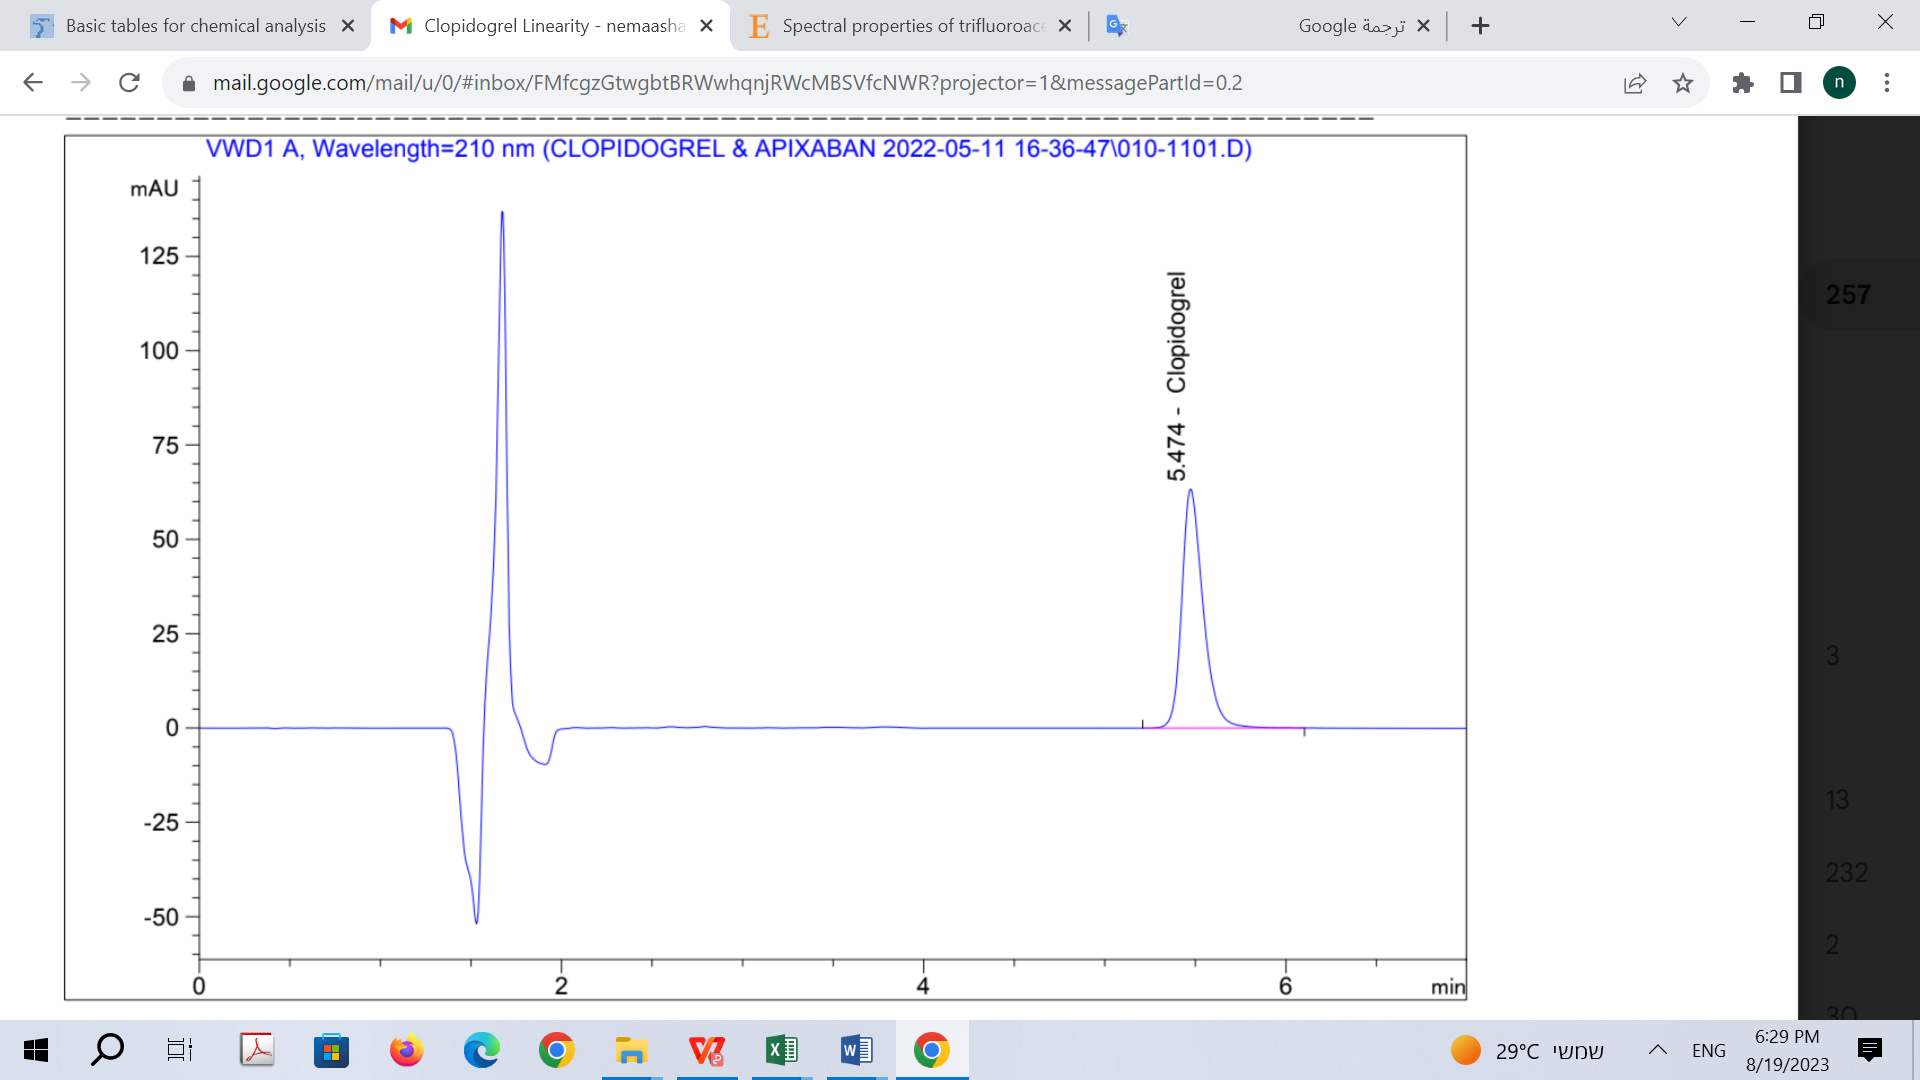


B

A


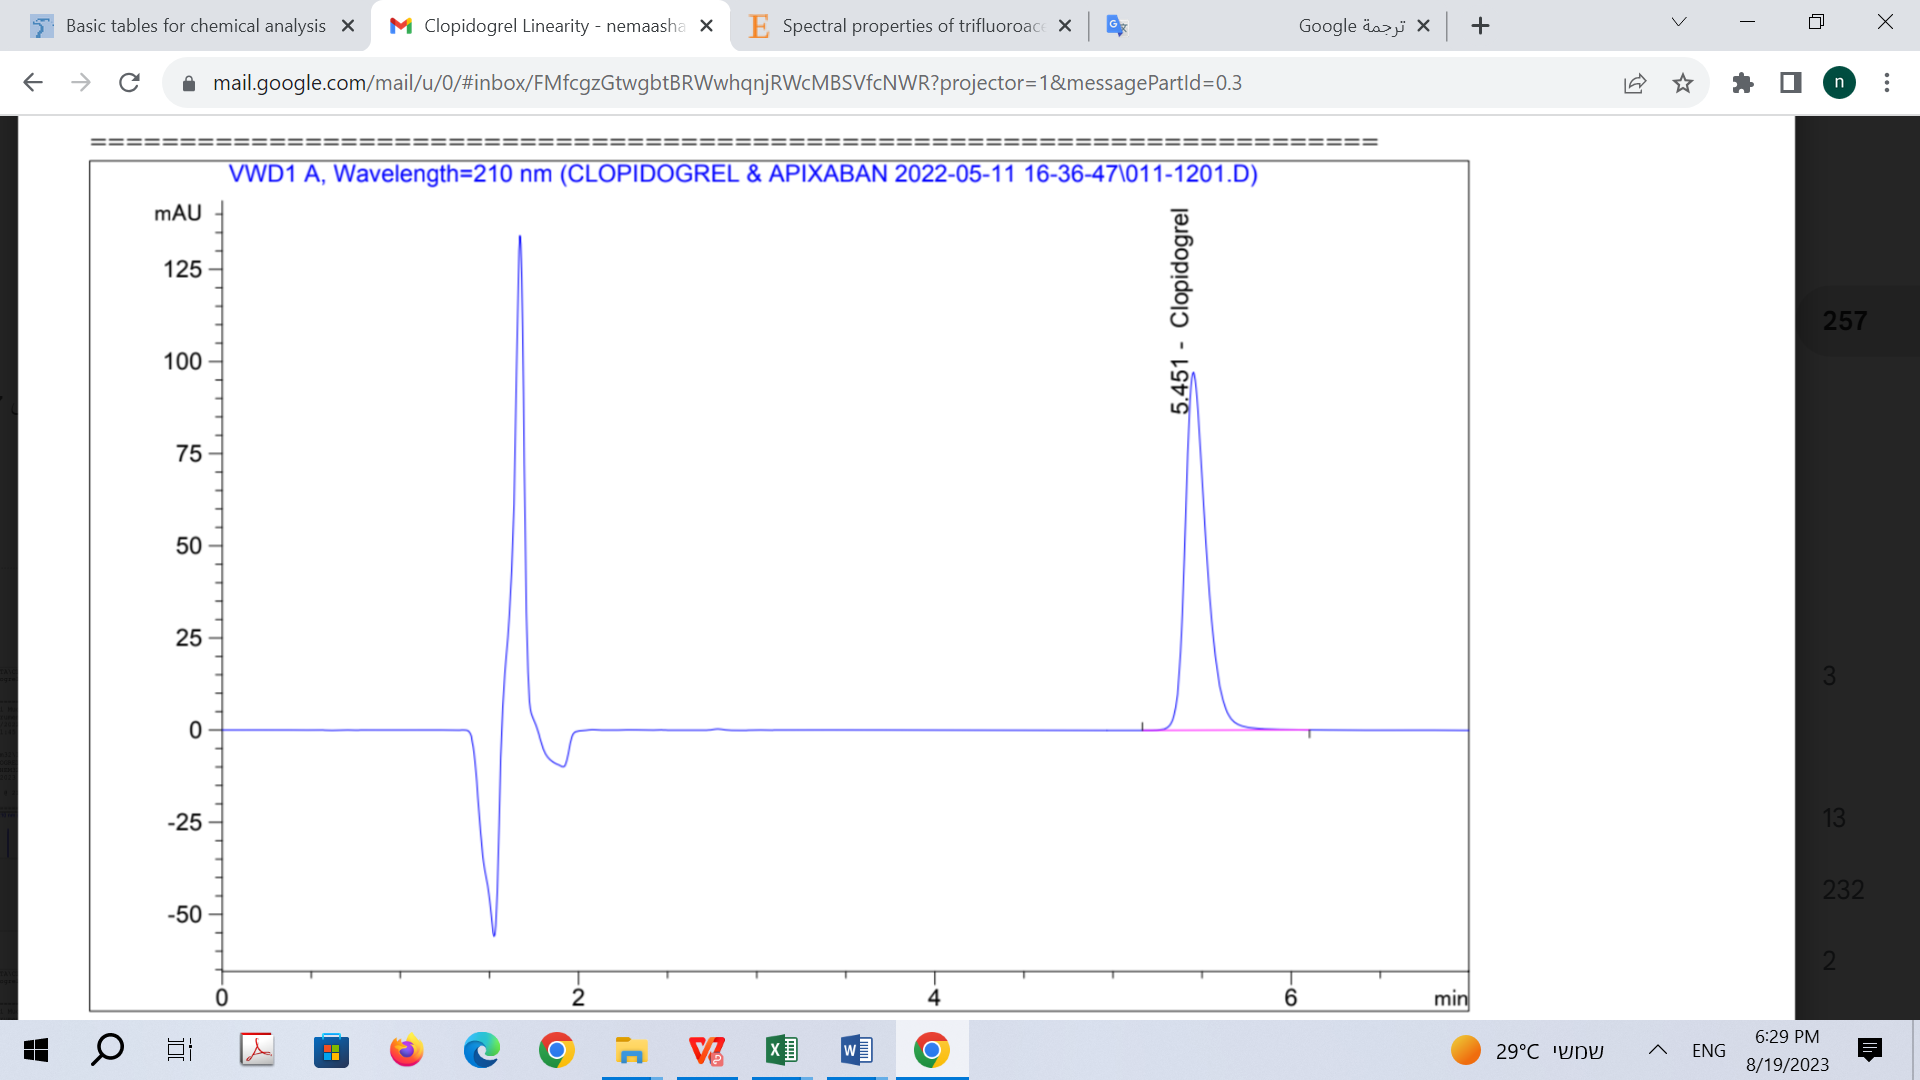

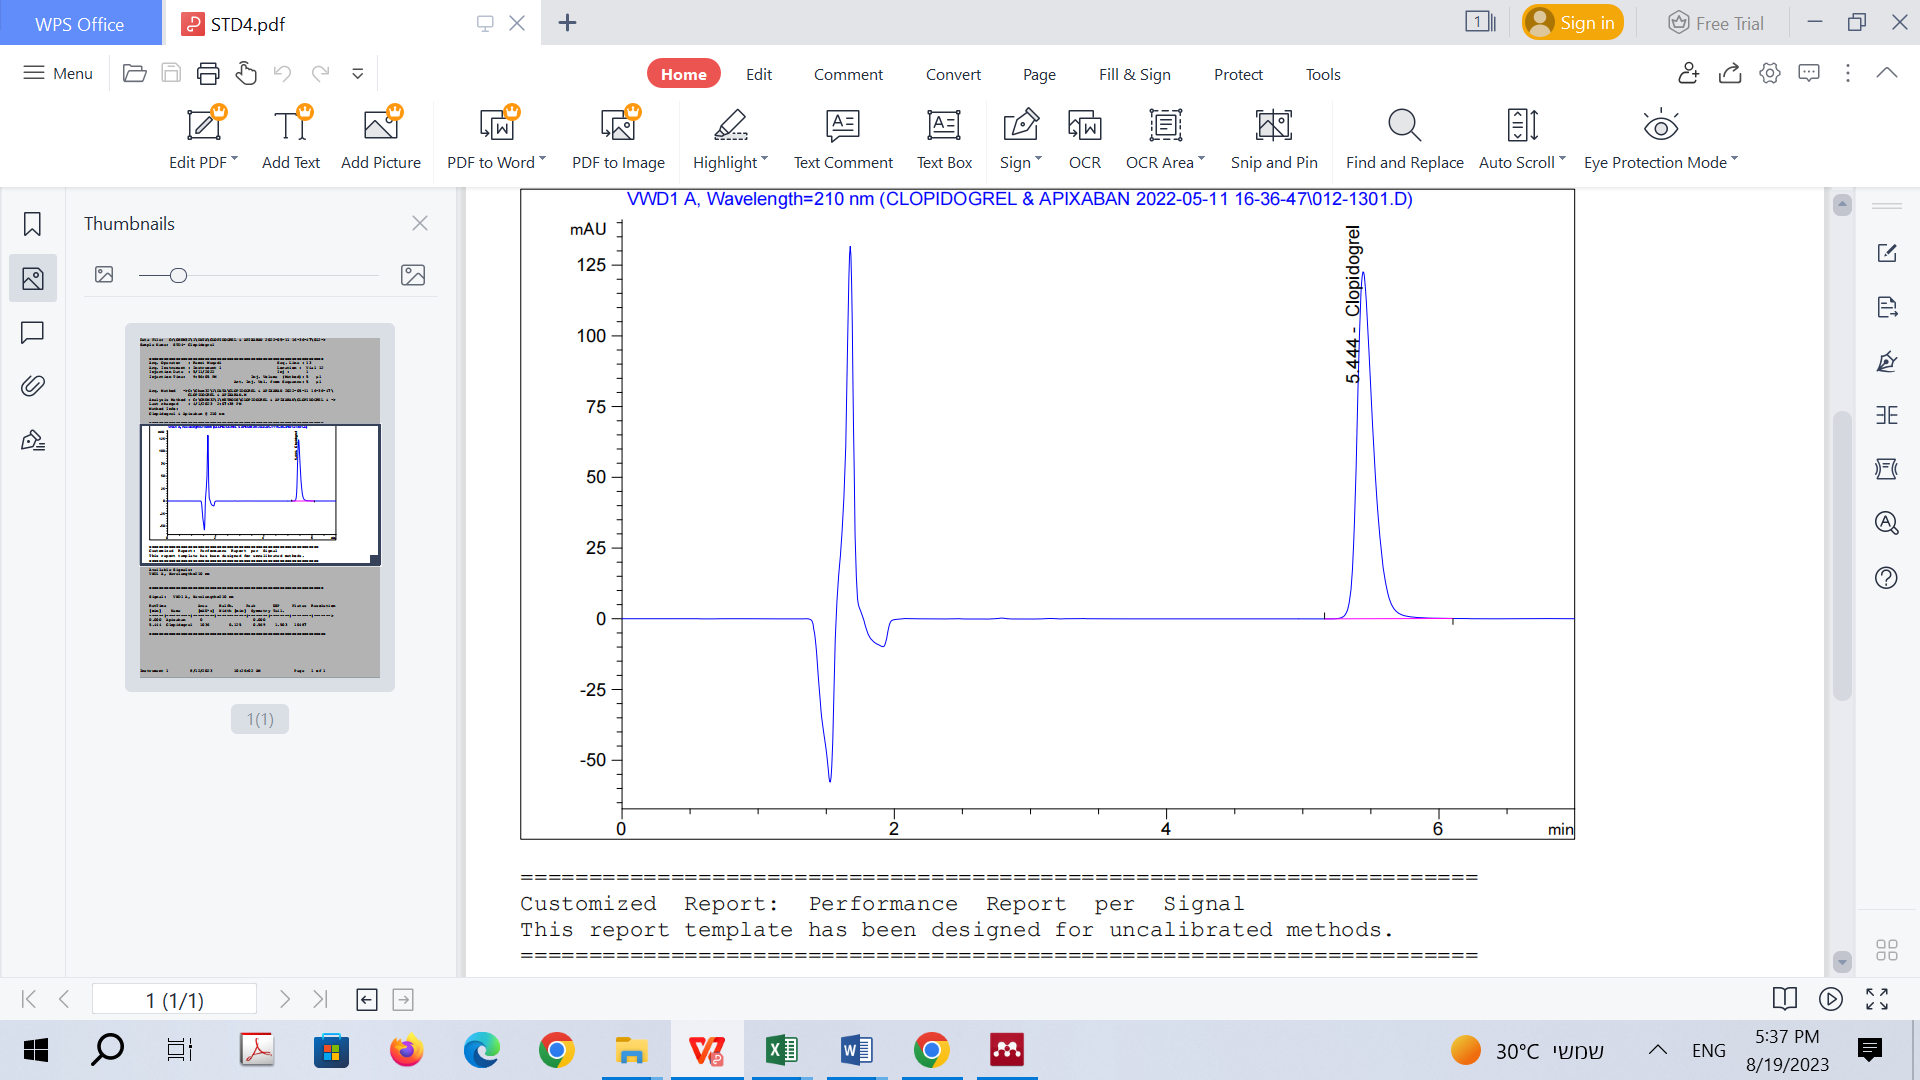


C

D


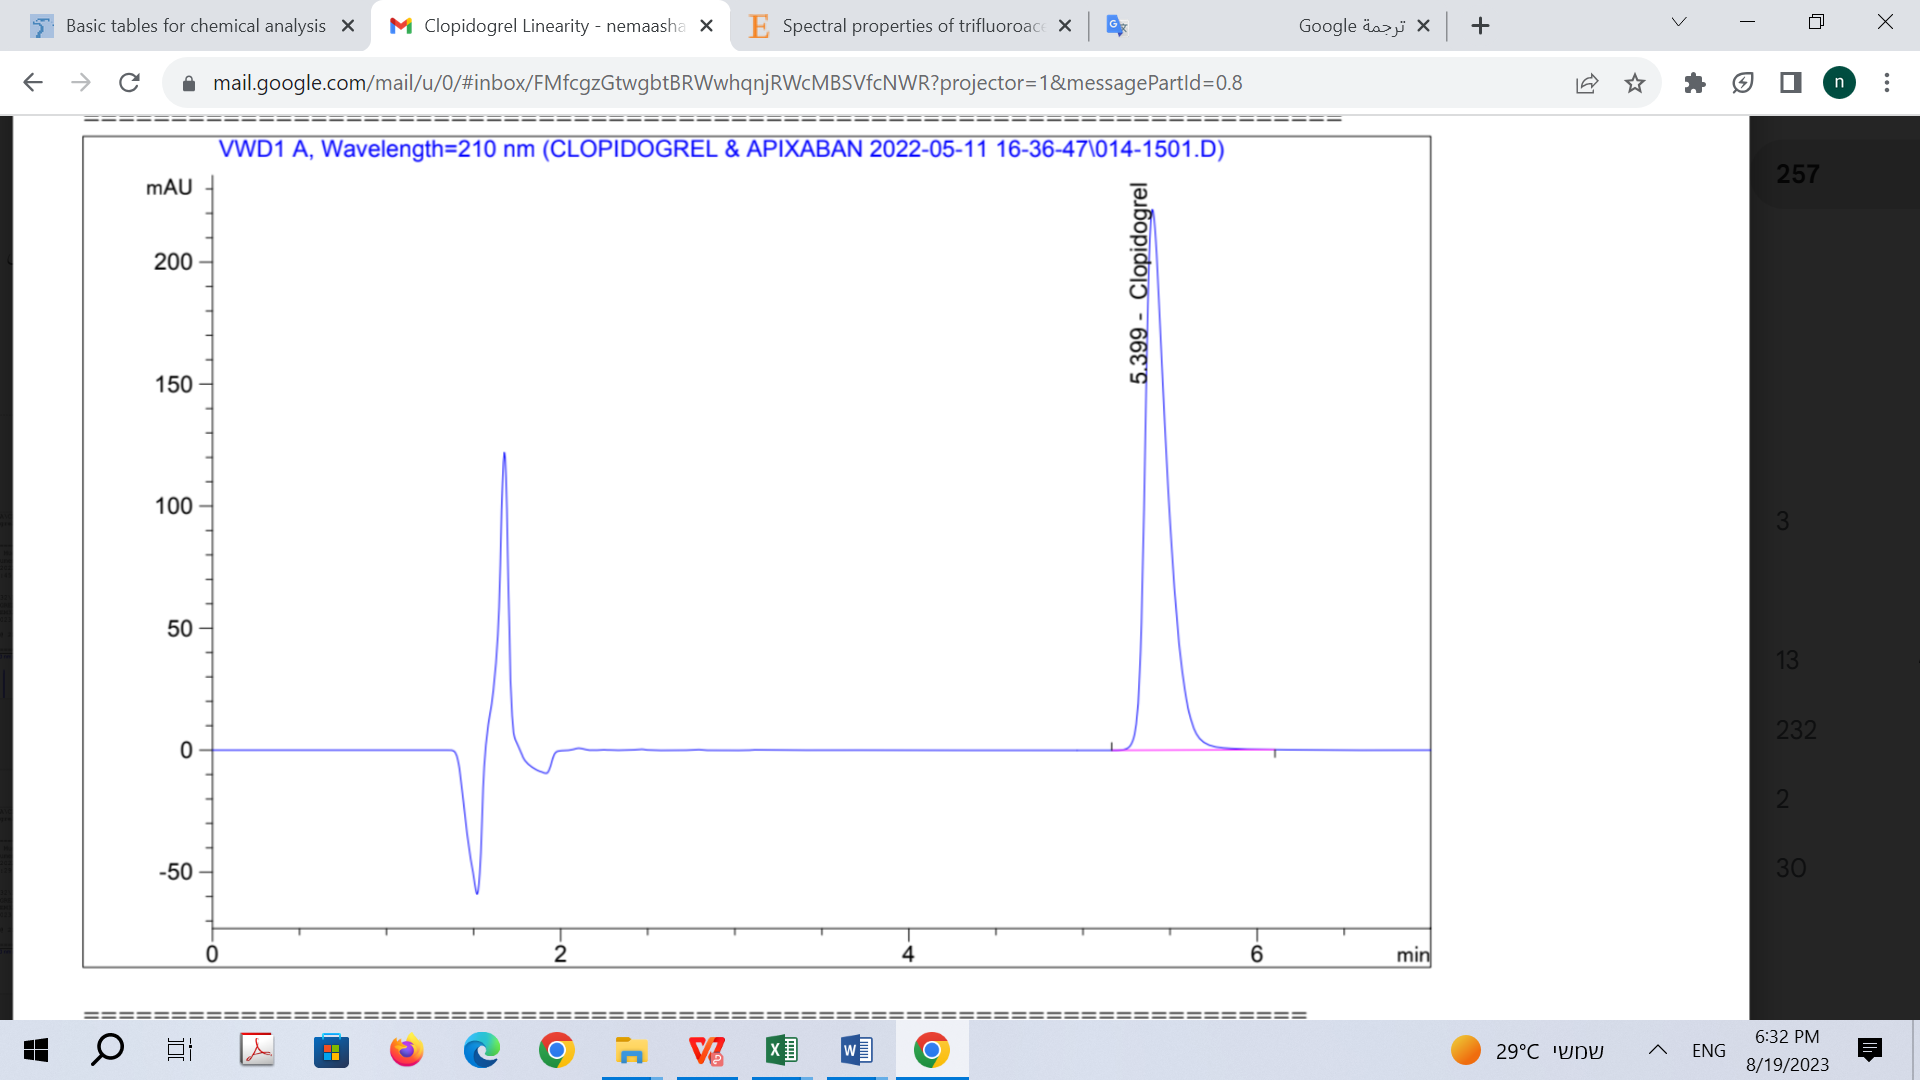

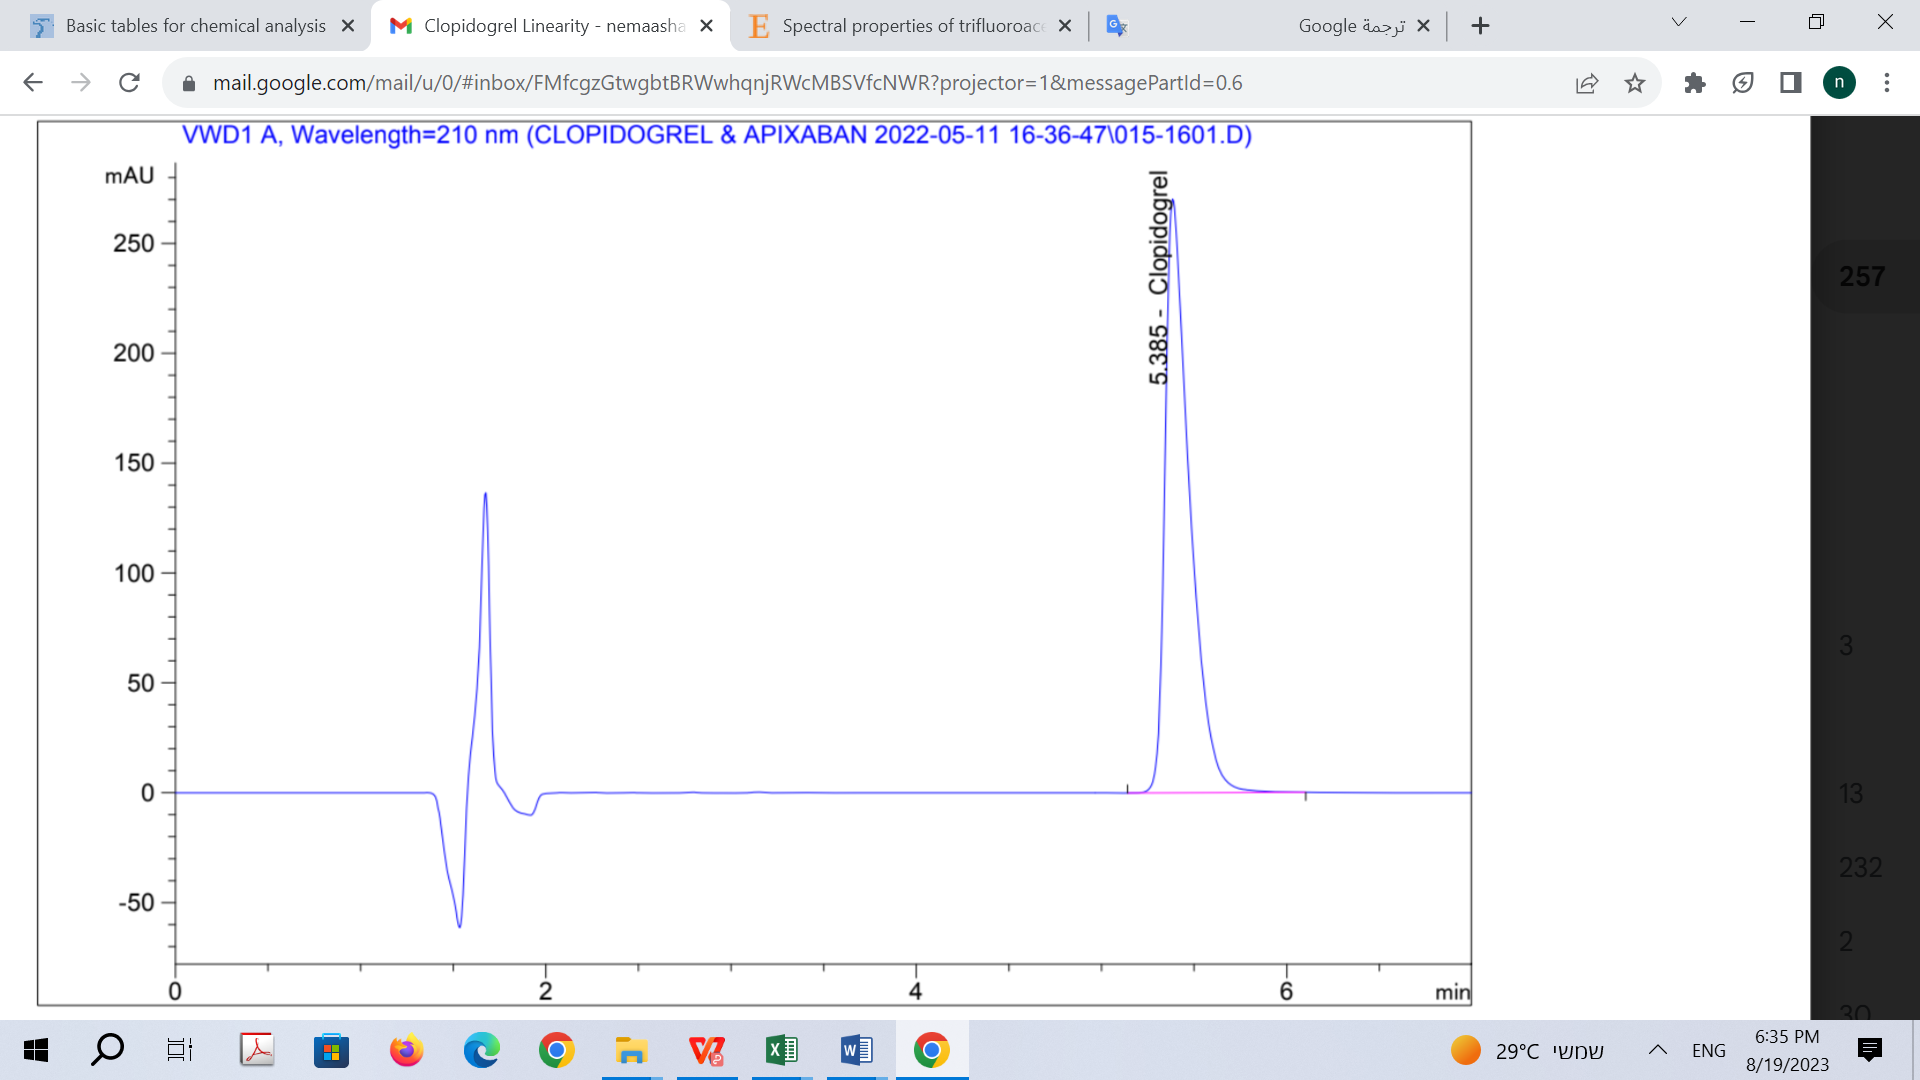


E

F

Figure 2: Clopidogrel linearity chromatograms; A: 18.75μg/ml, B: 37.5μg/ml, C: 60μg/ml, D: 75μg/ml, E: 112.5μg/ml, F: 150μg/ml.
